# Supplementary material for: Dietary supplement and complementary and alternative medicine use among older adults in Australia and the United States
Source: PubMed Central journal article supplement — J Am Geriatr Soc. Author manuscript; Available in PMC 2024 Jul 1. (PMC10460828; doi:10.1111/jgs.18305), 2023-02-28
Supplement: NIHMS1912932-supplement-Supplementary_Material.pdf [file NIHMS1912932-supplement-Supplementary_Material.pdf]

1 **Supplemental Table 1: Factors associated with odds of supplement/CAM use by country in the ASPREE**  
 2 **cohort**

| Variables                                    | Australia (n=13,455) |        | United States (n=1,683) |        |
|----------------------------------------------|----------------------|--------|-------------------------|--------|
|                                              | OR (95%CI)           | p      | OR (95%CI)              | p      |
| Age ( <i>per year</i> )                      | 0.99 (0.98-1.00)     | 0.007  | 0.99 (0.96-1.01)        | 0.183  |
| Sex( <i>ref male</i> )                       | 2.17 (2.01-2.34)     | <0.001 | 2.15 (1.67-2.79)        | <0.001 |
| Education ( <i>ref ≤ 12y education</i> )     | 1.20 (1.11-1.29)     | <0.001 | 1.29 (0.98-1.70)        | 0.067  |
| Living situation ( <i>ref living alone</i> ) | 0.87 (0.81-0.94)     | <0.001 | 0.86 (0.68-1.08)        | 0.196  |
| Polypharmacy                                 | 1.24 (1.14-1.36)     | <0.001 | 1.04 (0.78-1.38)        | 0.806  |
| Diabetes                                     | 0.85 (0.77-0.95)     | 0.003  | 0.71 (0.52-0.96)        | 0.028  |
| Frailty                                      | 1.06 (1.00-1.13)     | 0.034  | 1.13 (0.94-1.37)        | 0.194  |
| Development of MACE in-trial <sup>1</sup>    | 0.71 (0.57-0.89)     | 0.002  | 0.71 (0.37-1.34)        | 0.285  |

3  
 4 Multivariate regression analysis stratified by sex. Values given as adjusted Odds Ratios (95% CI)  
 5 <sup>1</sup> MACE: major adverse cardiovascular events including nonfatal myocardial infarction (MI) and fatal or nonfatal ischemic  
 6 stroke.

7  
 8  
 9
